# Supplementary figures and images for: HIF1α is required for NK cell metabolic adaptation during virus infection
Source: eLife journal article supplement (doi:10.7554/elife.68484), 2021-08-16

# Figure 5- figure supplement 1

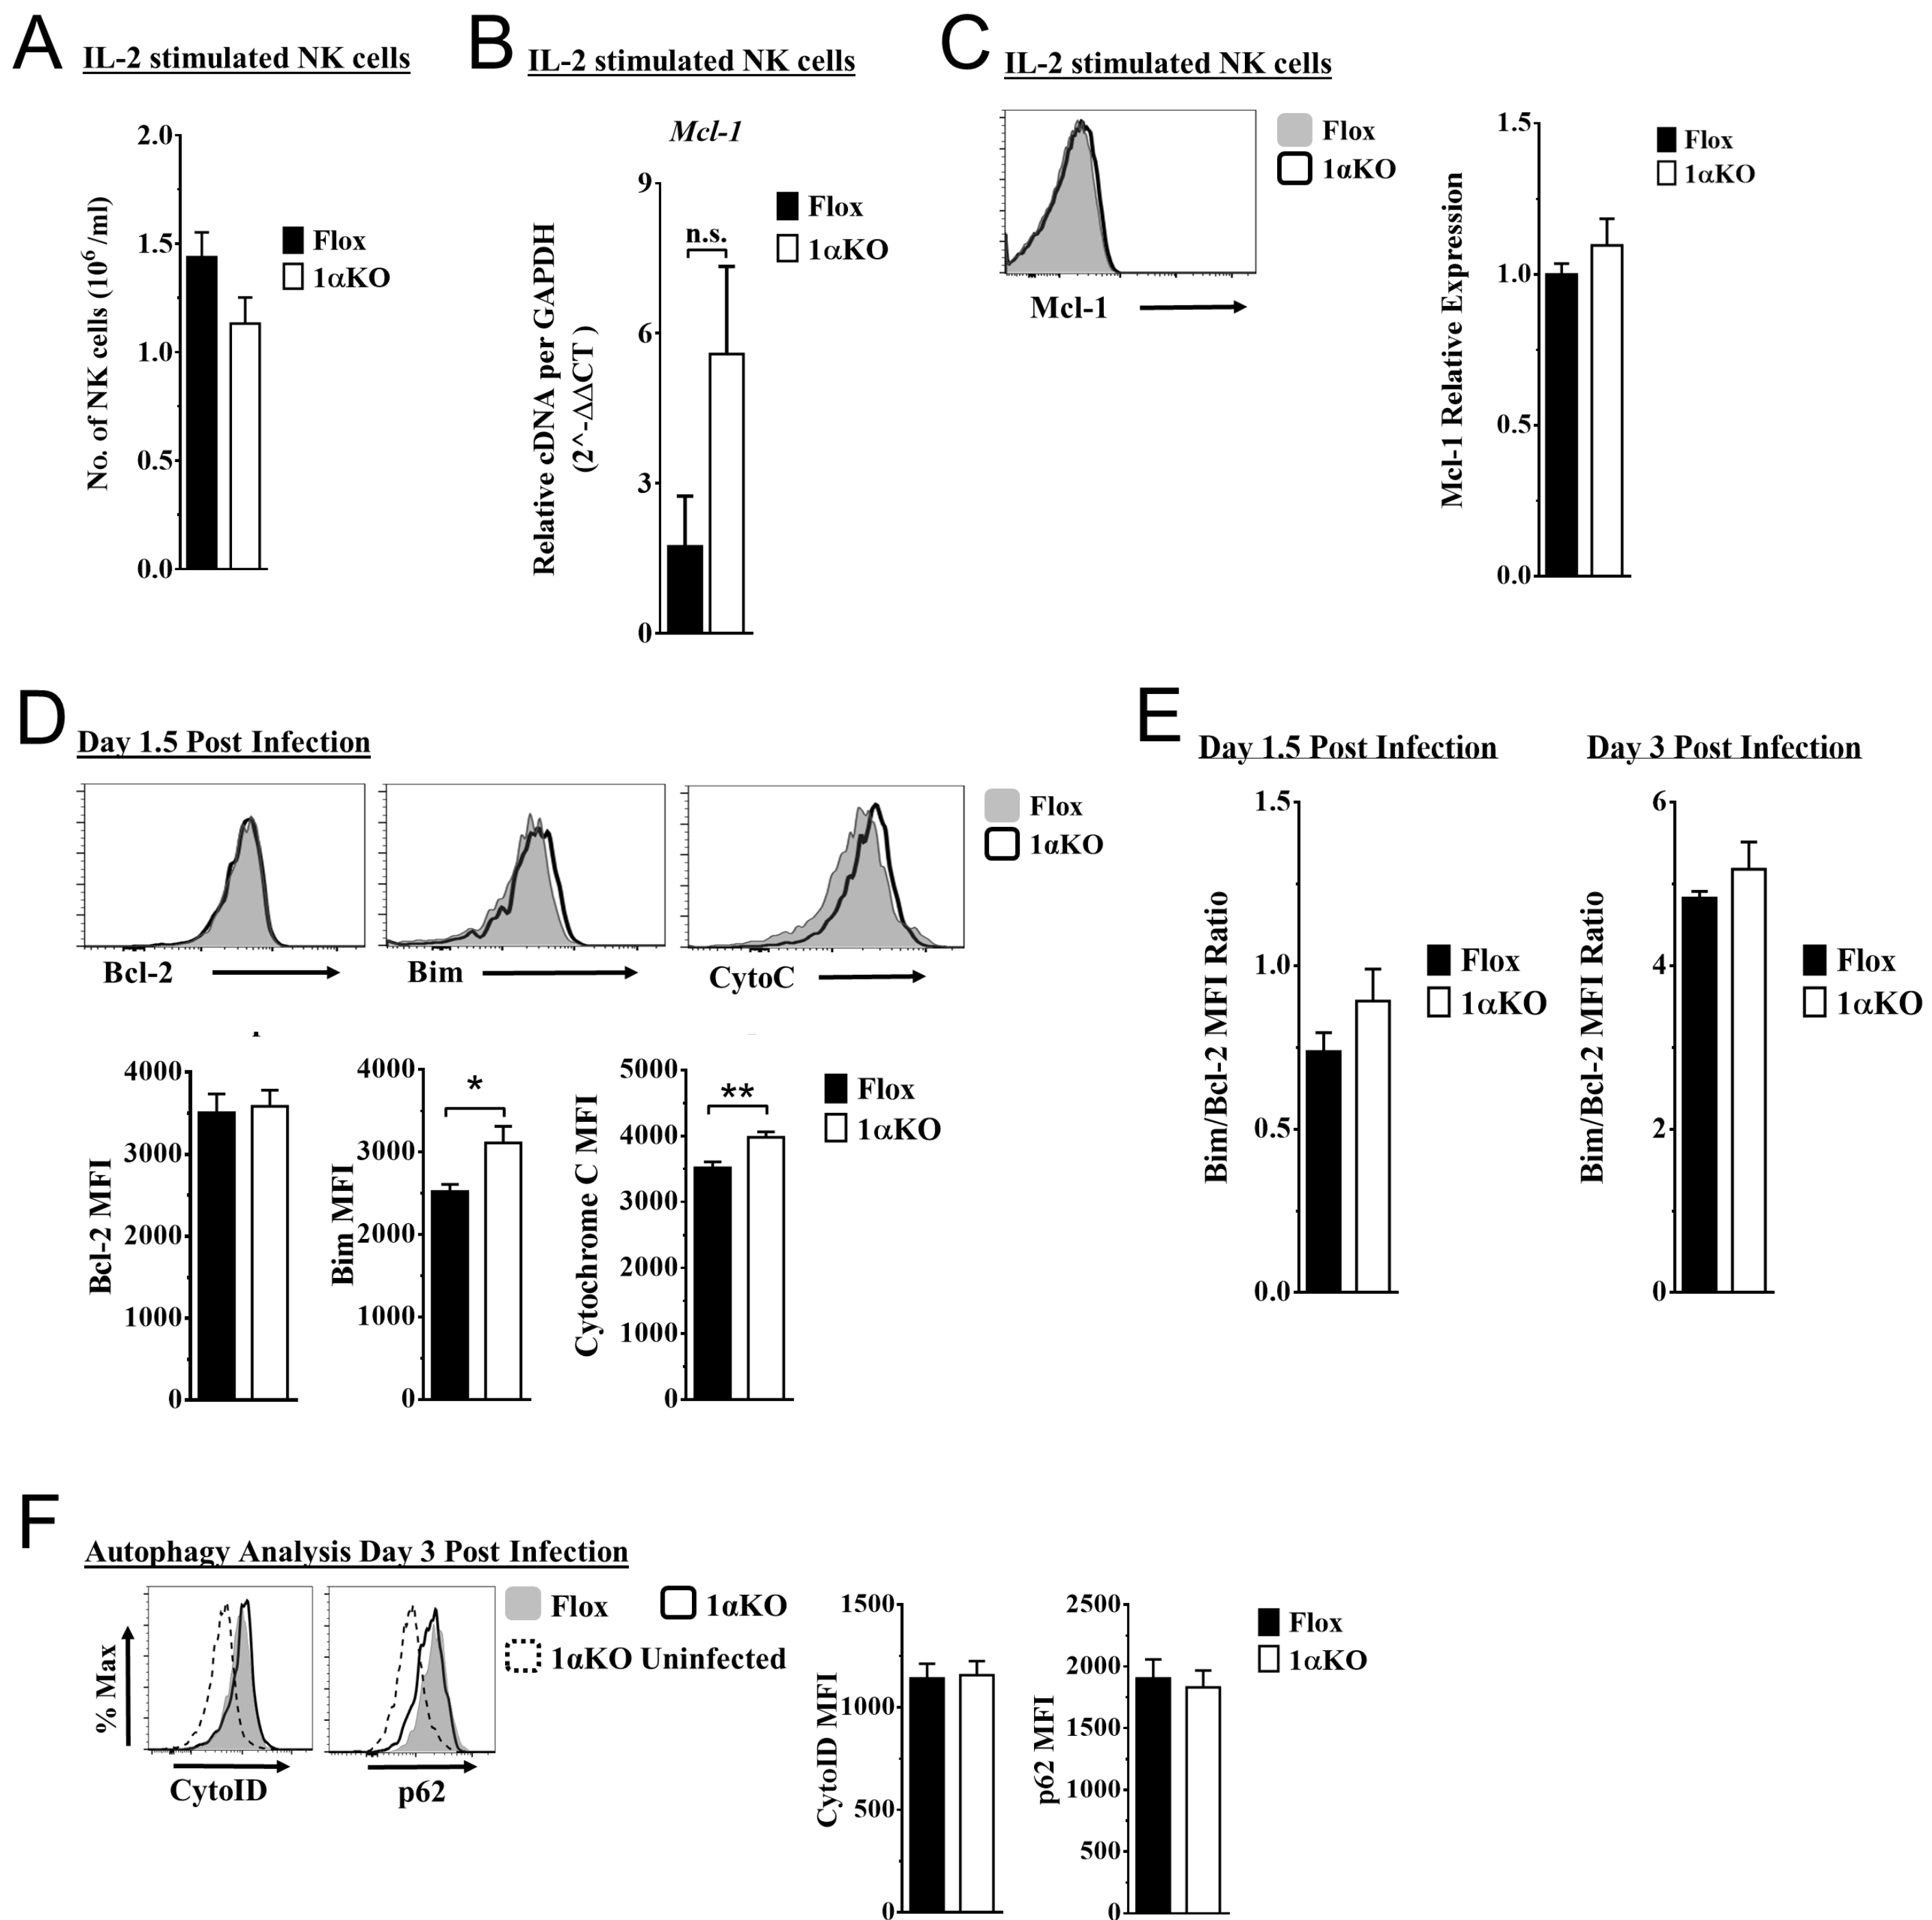

Supplement: supp [file elife-68484-supp-v1.zip]

# Figure 3- figure supplement 1

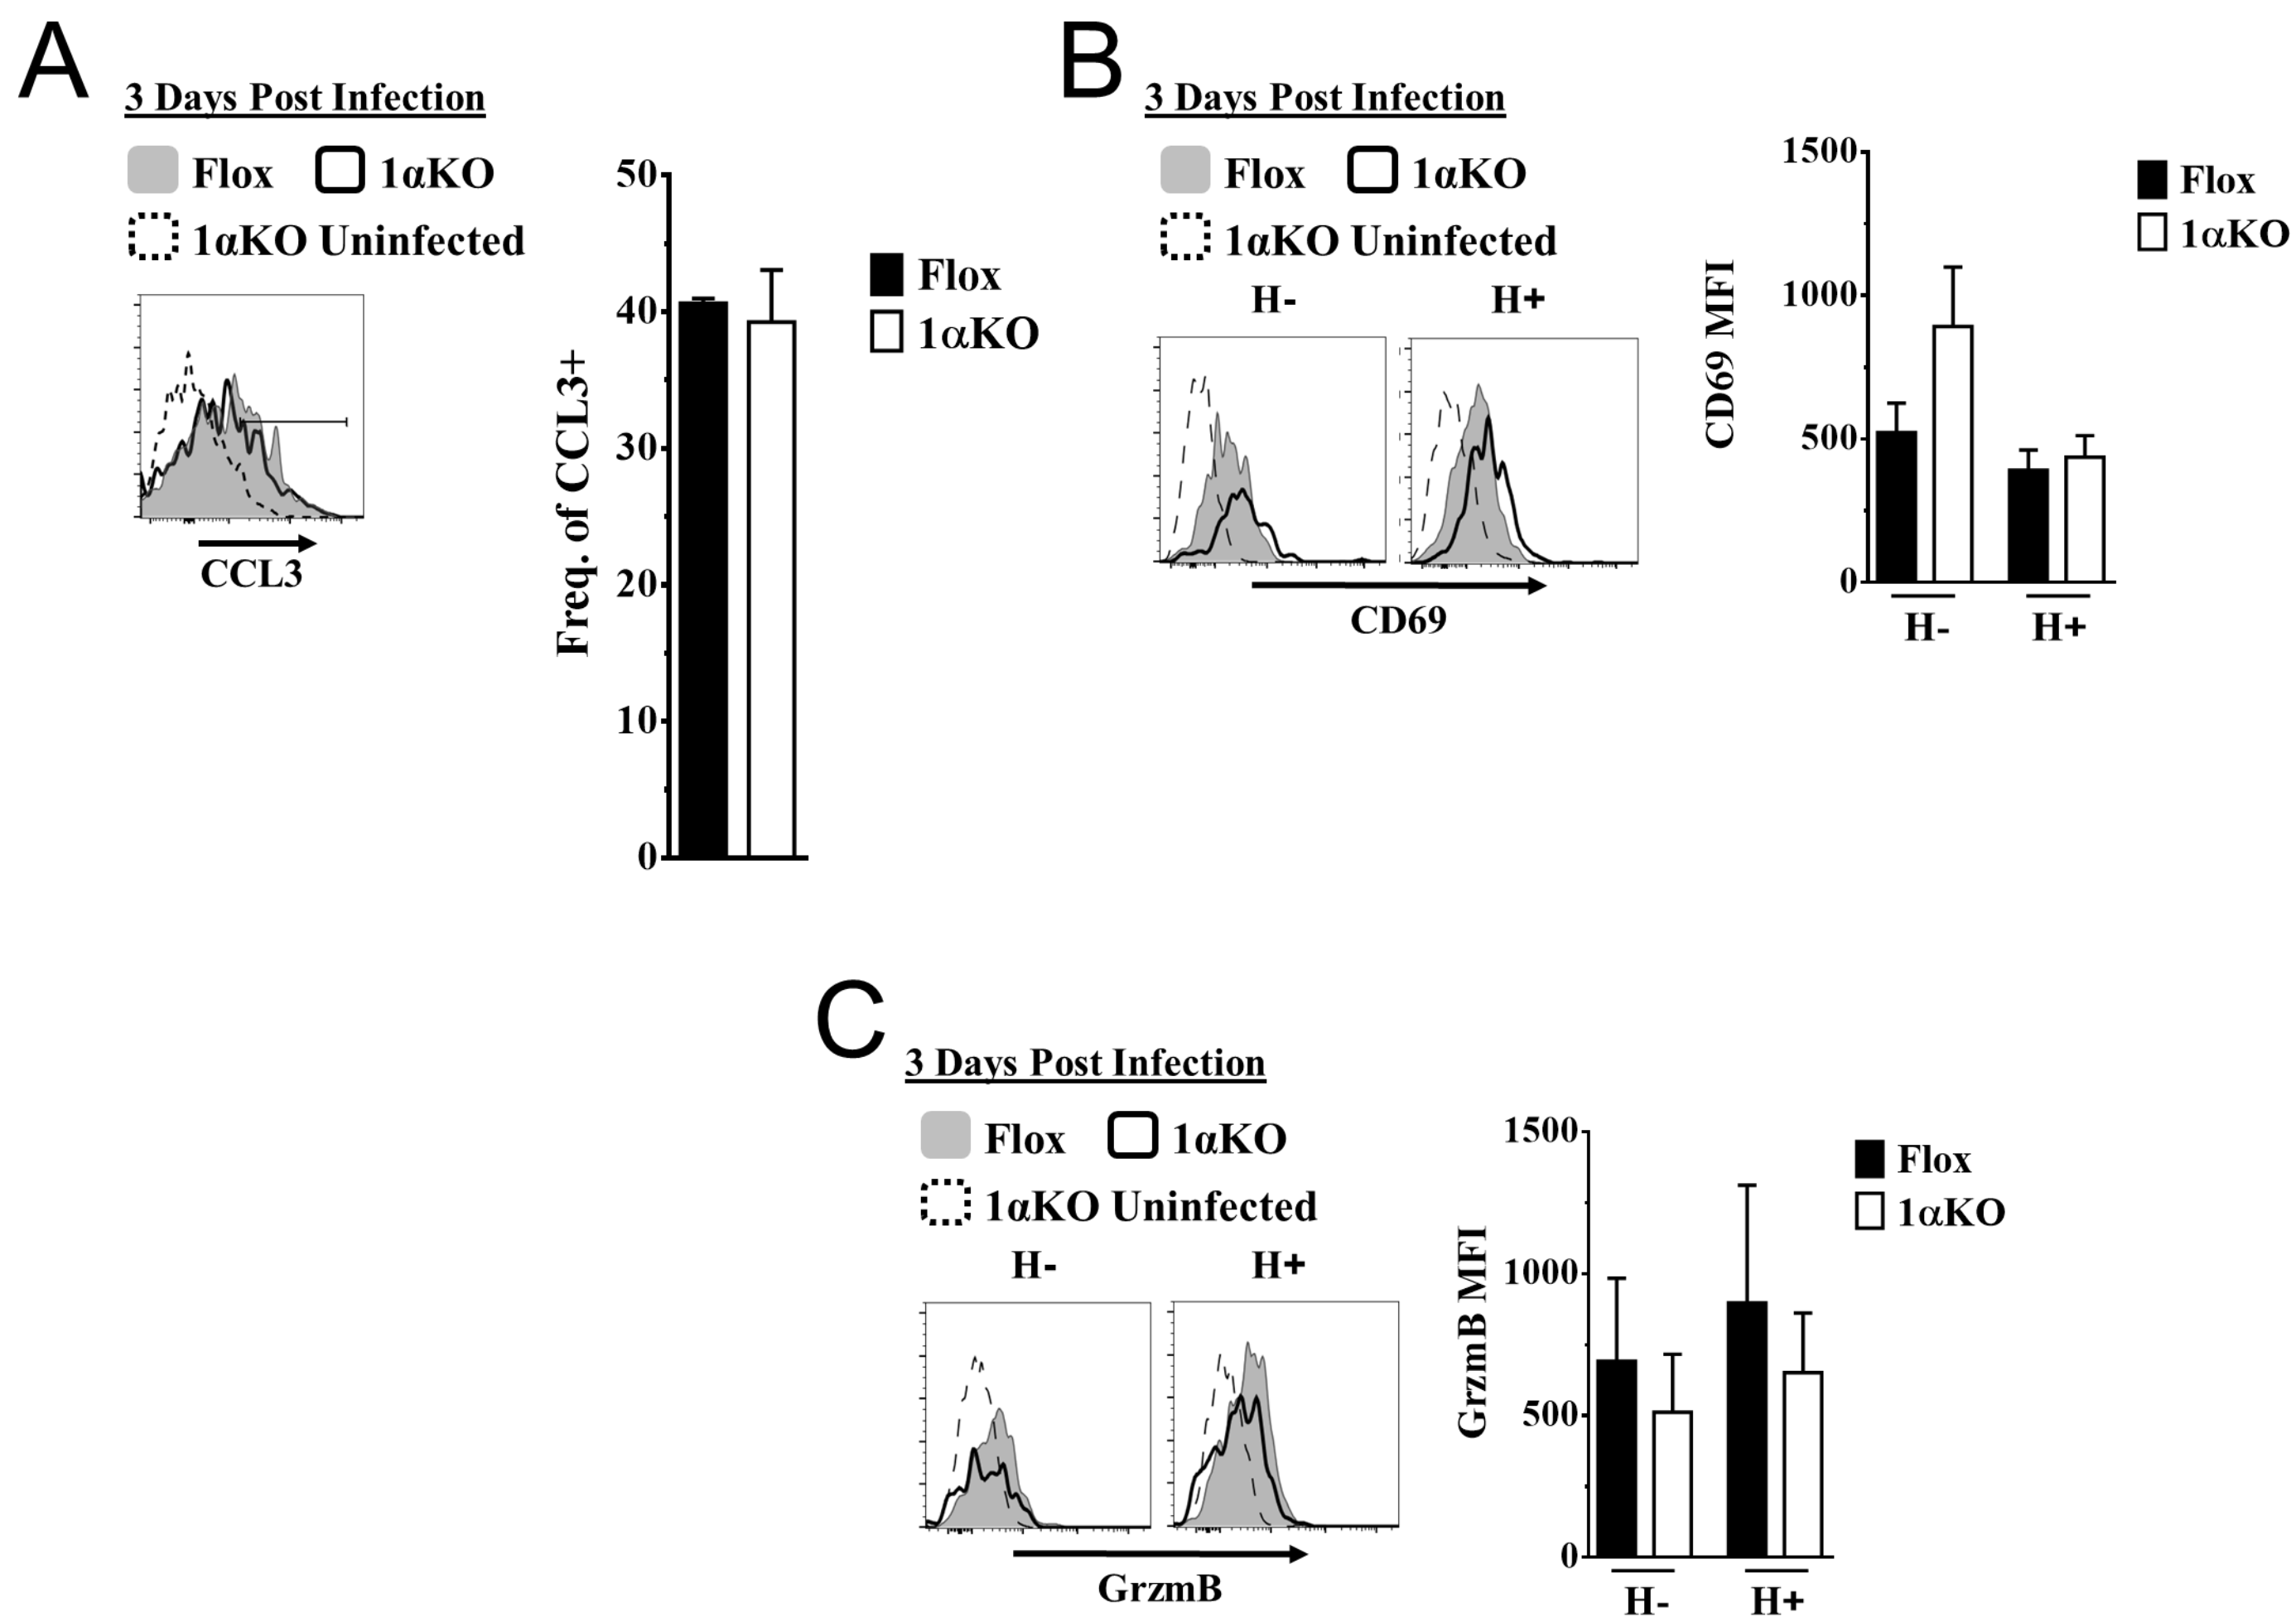

Supplement: supp [file elife-68484-supp-v1.zip]

# Figure 2- figure supplement 1

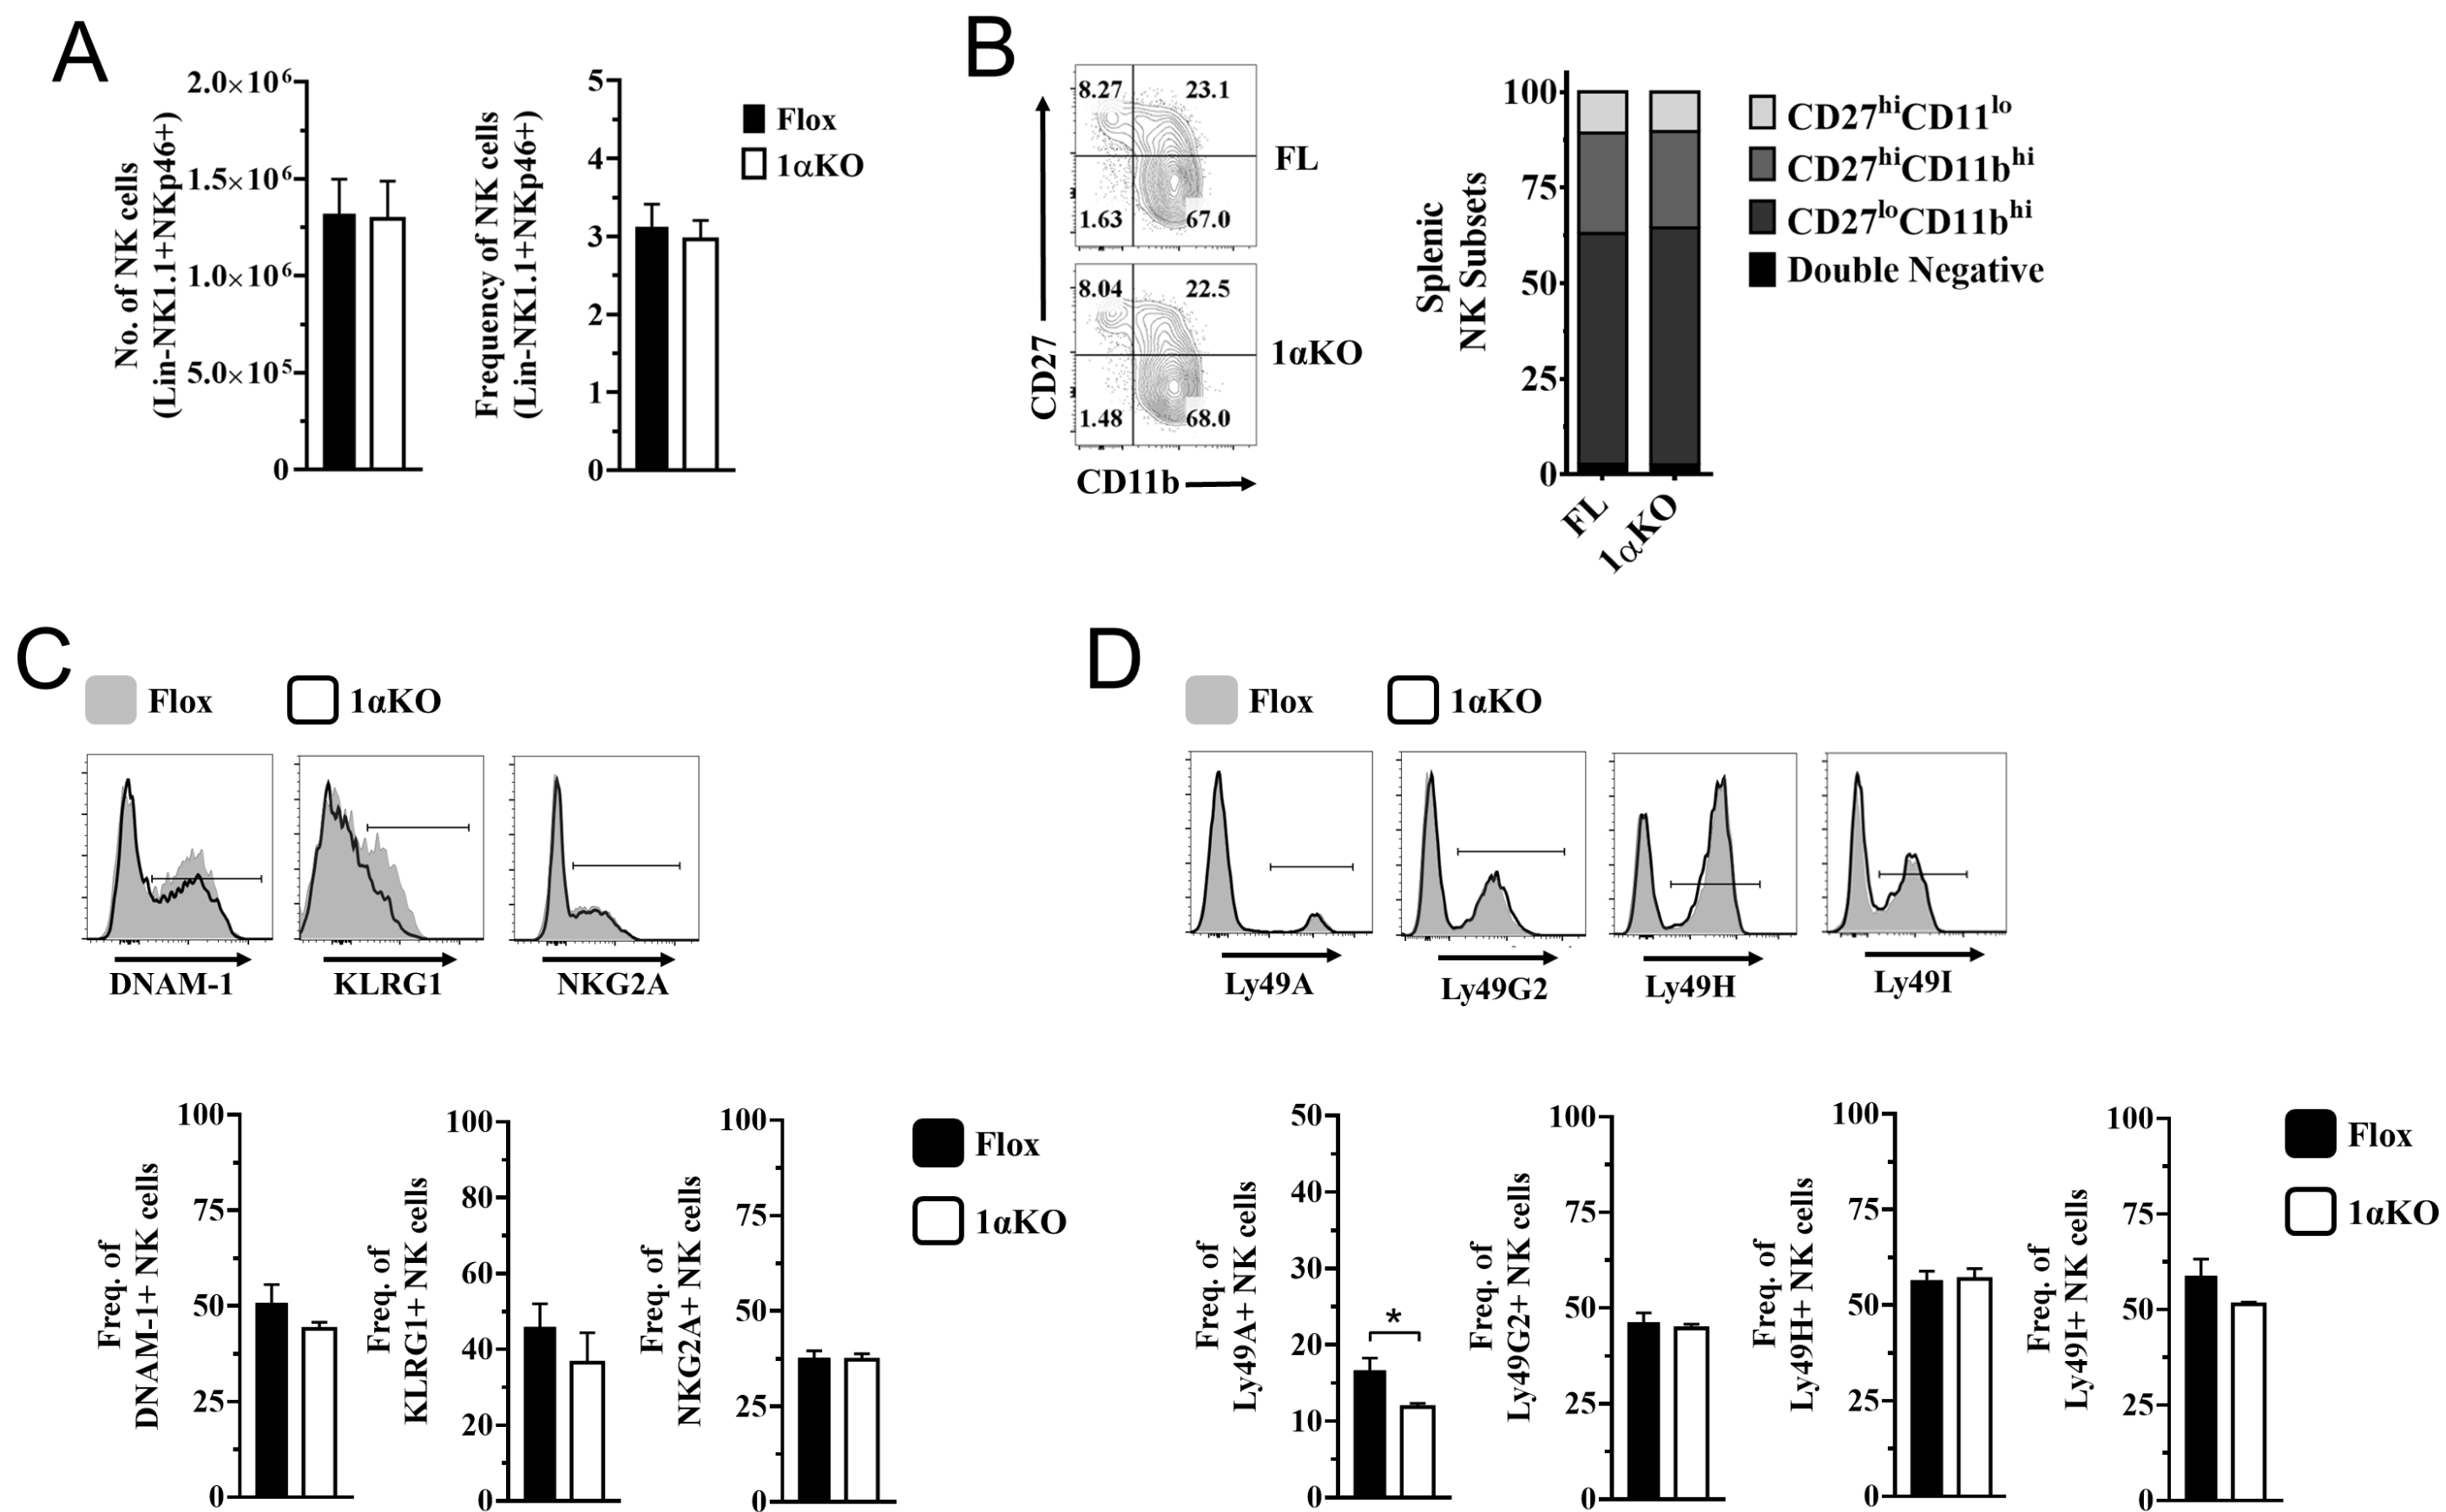

Supplement: supp [file elife-68484-supp-v1.zip]

# Figure 4- figure supplement 1

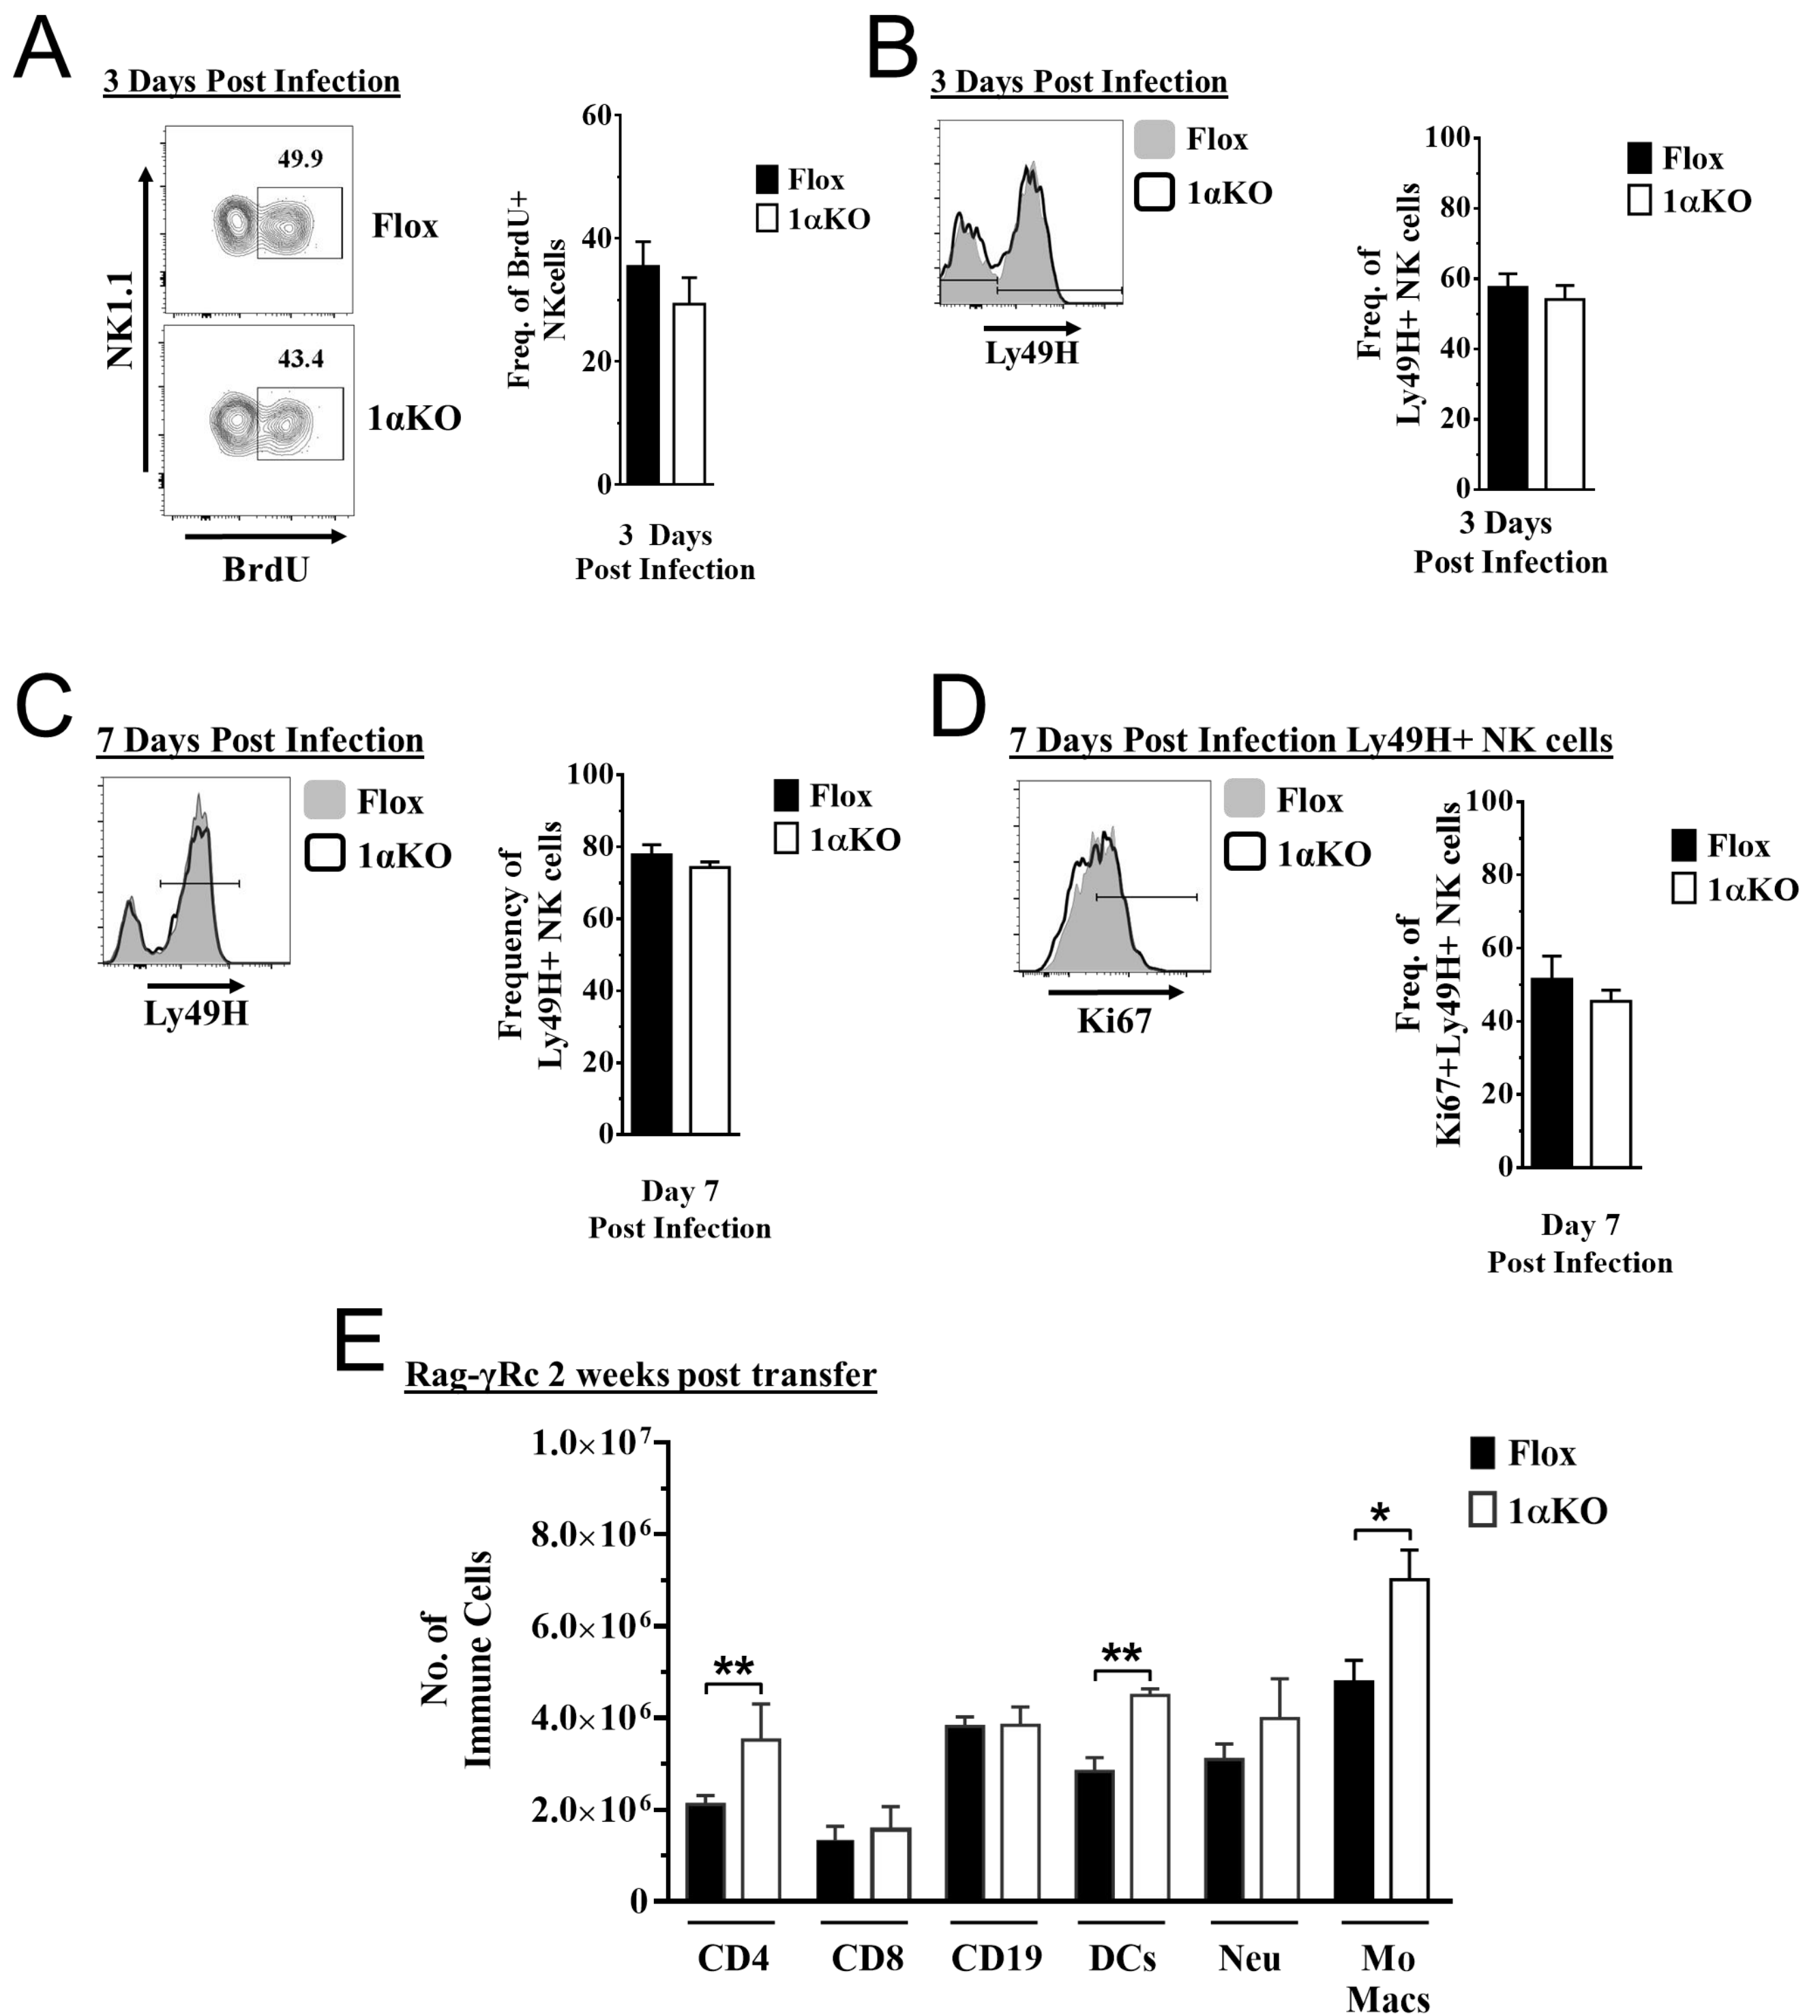

Supplement: supp [file elife-68484-supp-v1.zip]

# Figure 6- figure supplement 1

## Seahorse Mitostress Direct Ex Vivo

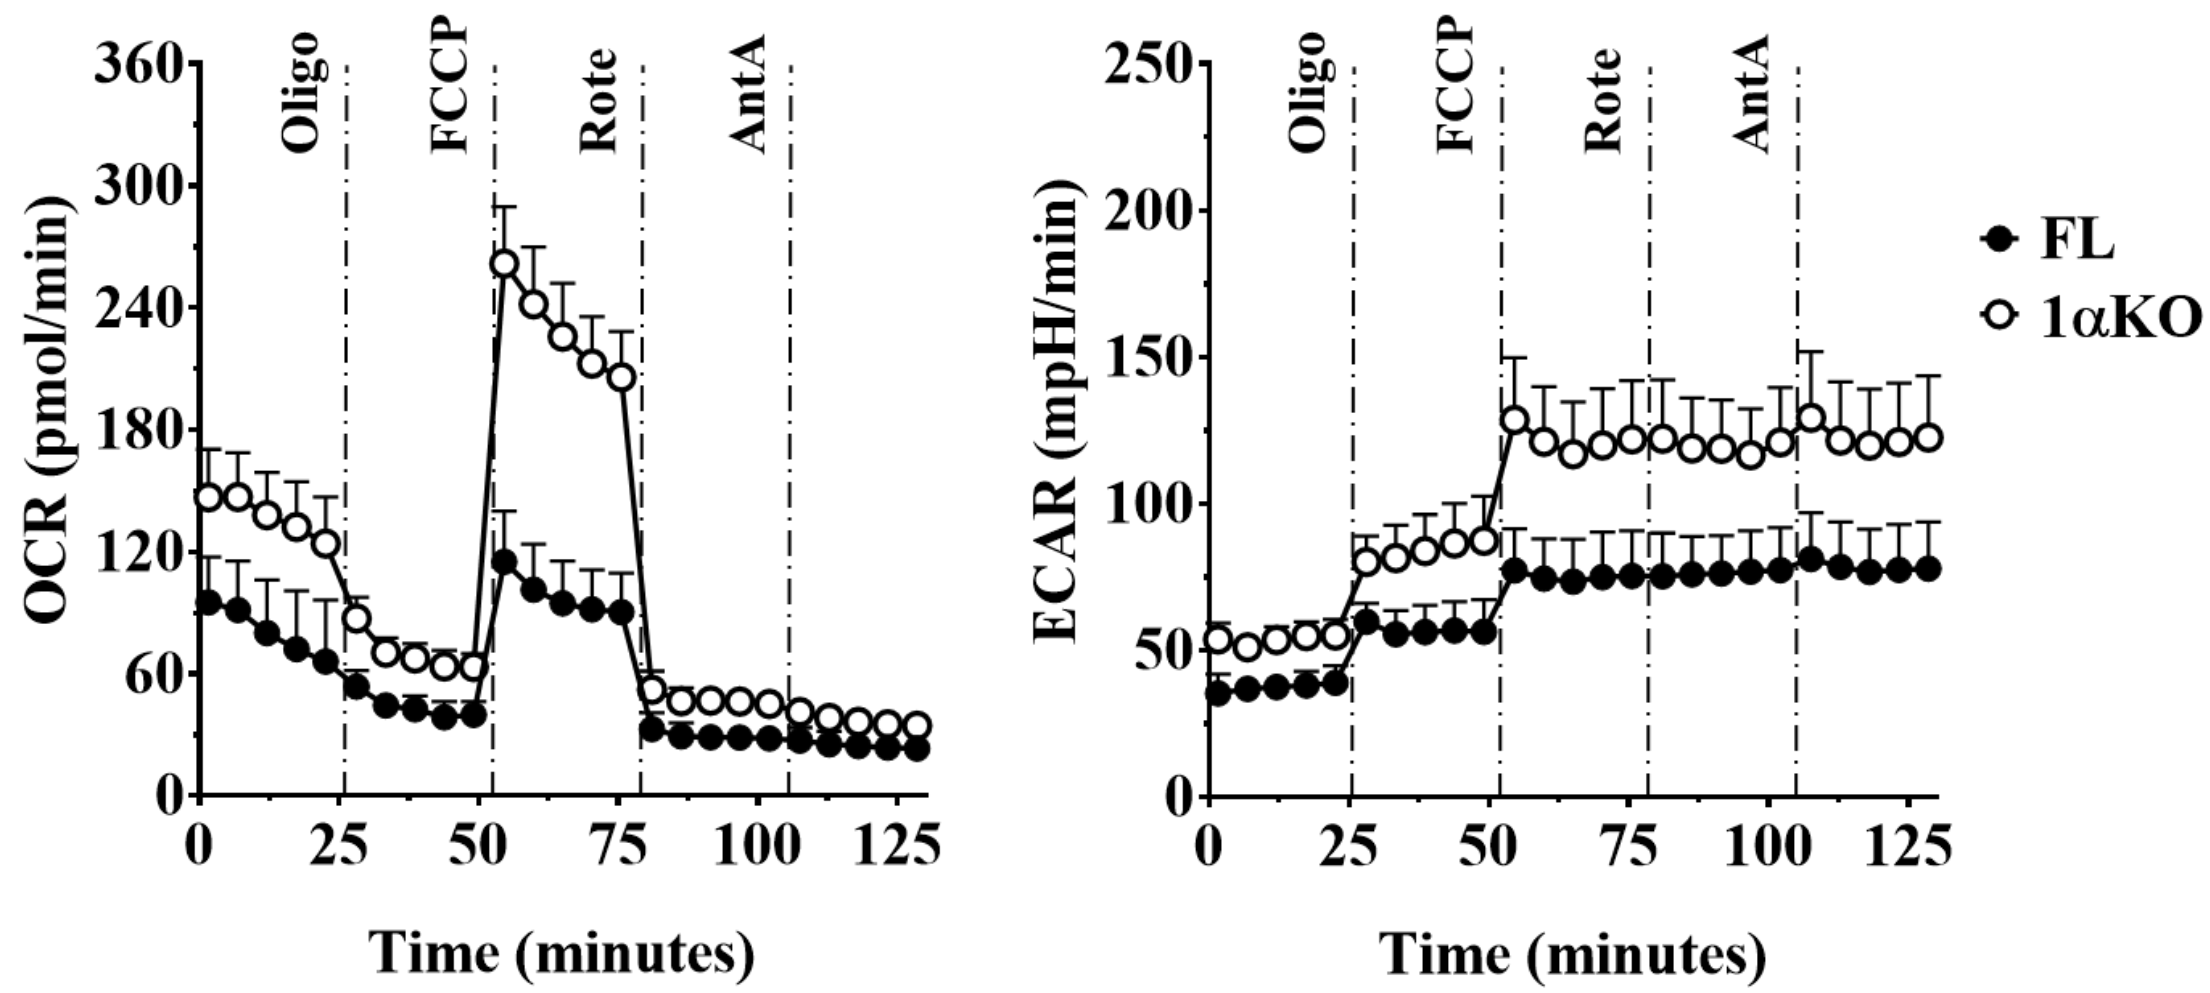

Supplement: supp [file elife-68484-supp-v1.zip]

# Figure 1- figure supplement 1

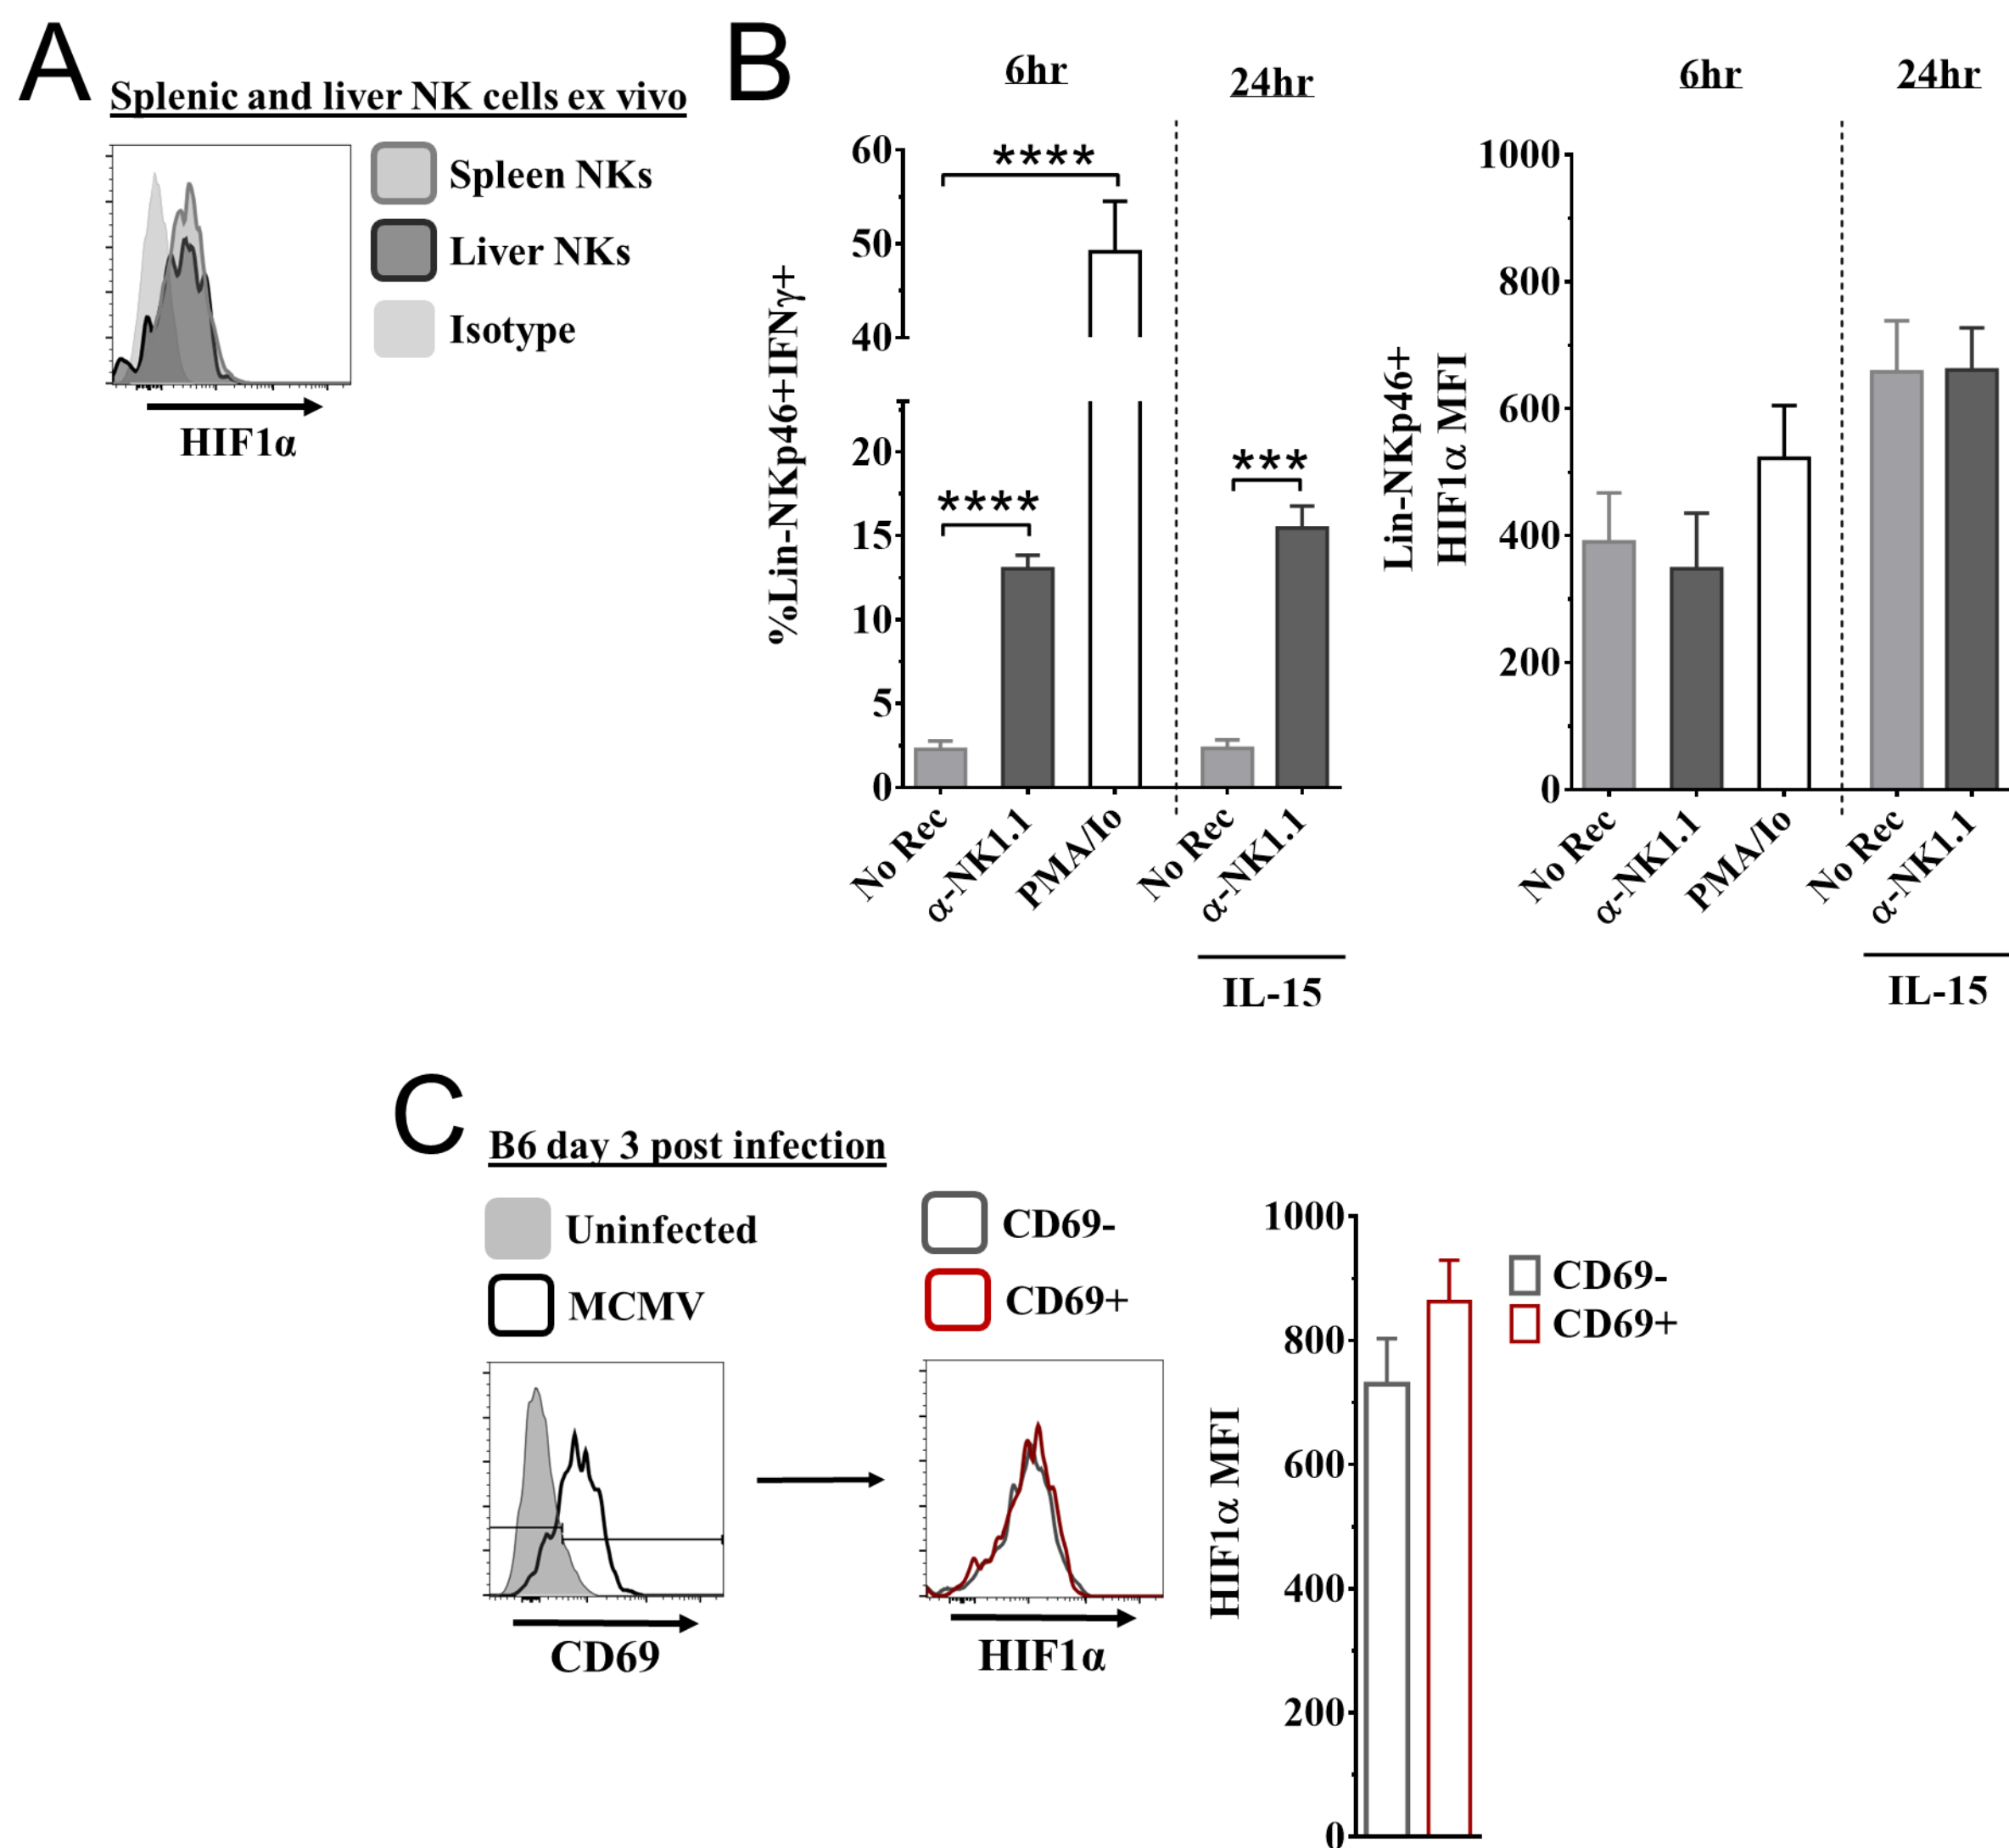

Supplement: supp [file elife-68484-supp-v1.zip]
